# Supplementary material
Source: PubMed Central journal article supplement (PMC6100151)
Supplement: Appendix_1.pdf [file Appendix_1.pdf]

**Appendix 1** Expert Group list of members

| <b>Name</b>             | <b>Title</b>                                                                                              |
|-------------------------|-----------------------------------------------------------------------------------------------------------|
| Dr Ali Cracknell        | Consultant in Elderly Medicine, Leeds Teaching Hospitals NHS Trust                                        |
| Dr Andrew Prestwich     | Senior Lecturer, School of Psychology, University of Leeds                                                |
| Professor Andrew Street | Professor of Health Economics, Centre for Health Economics, University of York                            |
| Dr Angela Grange        | Head of Nursing, Research and Innovation, Bradford Teaching Hospitals NHS Foundation Trust                |
| Dr Beverley Slater      | Director, Yorkshire & Humber Improvement Academy                                                          |
| Professor Carl Thompson | Professor of Applied Health Research, University of Leeds                                                 |
| Dr Claire Marsh         | Lead for Patient and Public Involvement, Yorkshire & Humber Improvement Academy                           |
| Dr Ian Kellar           | Associate Professor, School of Psychology, University of Leeds                                            |
| Dr Jane Heyhoe          | Research Fellow, Yorkshire Quality & Safety Research Group, Bradford Institute for Health Research        |
| Dr Jane O'Hara          | Lecturer in Patient Safety & Improvement Science, University of Leeds                                     |
| Professor Jo Cook       | Deputy Director and Capacity Lead, NIHR CLAHRC Yorkshire and Humber                                       |
| Professor John Wright   | Director of Research, Bradford Institute for Health Research                                              |
| Dr Jude Johnson         | Lecturer, School of Psychology, University of Leeds                                                       |
| Dr Katja Grasic         | Research Fellow, Centre for Health Economics, University of York                                          |
| Dr Laura Sheard         | Senior Research Fellow, Yorkshire Quality & Safety Research Group, Bradford Institute for Health Research |
| Dr Lesley Dewhurst      | Senior Research Fellow, Yorkshire Quality & Safety Research Group, Bradford Institute for Health Research |
| Professor Mark Conner   | Professor, School of Psychology, University of Leeds                                                      |

|                            |                                                                                                    |
|----------------------------|----------------------------------------------------------------------------------------------------|
| Dr Mark Purvis             | Director of Postgraduate General Practice Education, Health Education England Yorkshire & Humber   |
| Dr Michael McCooe          | Consultant Anaesthetist, Bradford Teaching Hospitals NHS Foundation Trust                          |
| Michael Rooney             | Senior Improvement Analyst, Yorkshire & Humber Improvement Academy                                 |
| Dr Nils Gutacker           | Research Fellow, Centre for Health Economics, University of York                                   |
| Professor Paul Chamberlain | Professor, Director of Art & Design Research Centre                                                |
| Professor Rebecca Lawton   | Professor, School of Psychology, University of Leeds                                               |
| Professor Robbie Foy       | Professor of Primary Care, Leeds Institute of Health Sciences, University of Leeds                 |
| Dr Ruth Baxter             | Research Fellow, Yorkshire Quality & Safety Research Group, Bradford Institute for Health Research |
| Dr Tom Sanders             | Senior Research Fellow, School of Health and Related Research, University of Sheffield             |
